# Supplementary material for: Mapping the Spatio-Temporal Distribution of Fall Armyworm in China by Coupling Multi-Factors
Source: MDPI journal article supplement (doi:10.3390/rs14174415), 2022-09-05
Supplement: s1 [file s1]

**Table S1.** The first observed invasion dates (week no.) and first simulated invasion dates (week no.) of fall armyworm in 125 cities in China

| Province | City code | Simulated<br>Initial<br>Invasion<br>Date of<br>FAW<br>(Week) | Observed<br>Initial<br>Invasion<br>Date of<br>FAW<br>(Week) | Province | City code | Simulated<br>Initial<br>Invasion<br>Date of<br>FAW<br>(Week) | Observed<br>Initial<br>Invasion<br>Date of<br>FAW<br>(Week) |
|----------|-----------|--------------------------------------------------------------|-------------------------------------------------------------|----------|-----------|--------------------------------------------------------------|-------------------------------------------------------------|
| Anhui    | 1         | 19                                                           | 20                                                          | Shandong | 64        | 29                                                           | 25                                                          |
| Anhui    | 2         | 27                                                           | 21                                                          | Shandong | 65        | 29                                                           | 29                                                          |
| Anhui    | 3         | 29                                                           | 30                                                          | Shandong | 66        | 26                                                           | 30                                                          |
| Anhui    | 4         | 19                                                           | 20                                                          | Shandong | 67        | 31                                                           | 30                                                          |
| Anhui    | 5         | 27                                                           | 26                                                          | Shandong | 68        | 31                                                           | 31                                                          |
| Anhui    | 6         | 26                                                           | 21                                                          | Shandong | 69        | 31                                                           | 29                                                          |
| Anhui    | 7         | 29                                                           | 24                                                          | Shanxi   | 70        | 31                                                           | 28                                                          |
| Anhui    | 8         | 30                                                           | 27                                                          | Shaanxi  | 71        | 25                                                           | 23                                                          |
| Anhui    | 9         | 18                                                           | 20                                                          | Shaanxi  | 72        | 30                                                           | 26                                                          |
| Anhui    | 10        | 18                                                           | 20                                                          | Shaanxi  | 73        | 25                                                           | 24                                                          |
| Anhui    | 11        | 27                                                           | 20                                                          | Shaanxi  | 74        | 31                                                           | 25                                                          |
| Anhui    | 12        | 25                                                           | 20                                                          | Shaanxi  | 75        | 31                                                           | 26                                                          |
| Anhui    | 13        | 25                                                           | 22                                                          | Shaanxi  | 76        | 30                                                           | 26                                                          |
| Anhui    | 14        | 29                                                           | 24                                                          | Shaanxi  | 77        | 31                                                           | 27                                                          |
| Anhui    | 15        | 25                                                           | 20                                                          | Shaanxi  | 78        | 31                                                           | 28                                                          |
| Gansu    | 16        | 25                                                           | 30                                                          | Shanghai | 79        | 24                                                           | 21                                                          |
| Guizhou  | 17        | 12                                                           | 18                                                          | Sichuan  | 80        | 24                                                           | 21                                                          |
| Guizhou  | 18        | 19                                                           | 20                                                          | Sichuan  | 81        | 16                                                           | 17                                                          |
| Guizhou  | 19        | 19                                                           | 17                                                          | Sichuan  | 82        | 19                                                           | 21                                                          |
| Guizhou  | 20        | 16                                                           | 19                                                          | Sichuan  | 83        | 25                                                           | 21                                                          |
| Guizhou  | 21        | 16                                                           | 18                                                          | Sichuan  | 84        | 24                                                           | 25                                                          |
| Guizhou  | 22        | 14                                                           | 17                                                          | Sichuan  | 85        | 25                                                           | 21                                                          |
| Guizhou  | 23        | 12                                                           | 17                                                          | Sichuan  | 86        | 20                                                           | 19                                                          |
| Guizhou  | 24        | 16                                                           | 19                                                          | Sichuan  | 87        | 18                                                           | 19                                                          |
| Guizhou  | 25        | 16                                                           | 19                                                          | Sichuan  | 88        | 25                                                           | 25                                                          |
| Henan    | 26        | 25                                                           | 29                                                          | Sichuan  | 89        | 25                                                           | 20                                                          |
| Henan    | 27        | 24                                                           | 25                                                          | Sichuan  | 90        | 27                                                           | 20                                                          |
| Henan    | 28        | 25                                                           | 27                                                          | Sichuan  | 91        | 24                                                           | 20                                                          |
| Henan    | 29        | 31                                                           | 25                                                          | Sichuan  | 92        | 25                                                           | 20                                                          |
| Henan    | 30        | 18                                                           | 19                                                          | Sichuan  | 93        | 25                                                           | 20                                                          |
| Henan    | 31        | 29                                                           | 25                                                          | Sichuan  | 94        | 25                                                           | 22                                                          |
| Henan    | 32        | 25                                                           | 24                                                          | Zhejiang | 95        | 19                                                           | 19                                                          |
| Hubei    | 33        | 19                                                           | 20                                                          | Zhejiang | 96        | 24                                                           | 20                                                          |

|           |    |    |    |          |     |    |    |
|-----------|----|----|----|----------|-----|----|----|
| Hubei     | 34 | 19 | 20 | Zhejiang | 97  | 23 | 20 |
| Hubei     | 35 | 18 | 20 | Zhejiang | 98  | 19 | 19 |
| Hubei     | 36 | 18 | 20 | Zhejiang | 99  | 23 | 21 |
| Hubei     | 37 | 19 | 21 | Zhejiang | 100 | 18 | 20 |
| Hubei     | 38 | 18 | 20 | Zhejiang | 101 | 19 | 21 |
| Hubei     | 39 | 24 | 21 | Zhejiang | 102 | 19 | 20 |
| Hubei     | 40 | 19 | 24 | Zhejiang | 103 | 18 | 21 |
| Hubei     | 41 | 18 | 20 | Jiangsu  | 104 | 25 | 21 |
| Hubei     | 42 | 18 | 19 | Jiangsu  | 105 | 29 | 29 |
| Hubei     | 43 | 19 | 20 | Jiangsu  | 106 | 29 | 30 |
| Hubei     | 44 | 19 | 21 | Jiangsu  | 107 | 25 | 27 |
| Hubei     | 45 | 19 | 19 | Jiangsu  | 108 | 26 | 25 |
| Hubei     | 46 | 24 | 20 | Jiangsu  | 109 | 24 | 24 |
| Hubei     | 47 | 18 | 21 | Jiangsu  | 110 | 27 | 25 |
| Hubei     | 48 | 19 | 21 | Jiangsu  | 111 | 25 | 21 |
| Hunan     | 49 | 18 | 19 | Jiangsu  | 112 | 29 | 30 |
| Hunan     | 50 | 16 | 17 | Jiangsu  | 113 | 29 | 23 |
| Hunan     | 51 | 16 | 19 | Jiangsu  | 114 | 27 | 24 |
| Hunan     | 52 | 16 | 19 | Jiangsu  | 115 | 27 | 23 |
| Hunan     | 53 | 16 | 20 | Jiangsu  | 116 | 25 | 24 |
| Hunan     | 54 | 16 | 17 | Jiangxi  | 117 | 16 | 20 |
| Hunan     | 55 | 16 | 20 | Jiangxi  | 118 | 18 | 21 |
| Hunan     | 56 | 16 | 20 | Jiangxi  | 119 | 18 | 20 |
| Hunan     | 57 | 16 | 19 | Jiangxi  | 120 | 16 | 20 |
| Hunan     | 58 | 16 | 19 | Jiangxi  | 121 | 16 | 21 |
| Hunan     | 59 | 16 | 19 | Jiangxi  | 122 | 18 | 20 |
| Hunan     | 60 | 16 | 19 | Jiangxi  | 123 | 18 | 20 |
| Hunan     | 61 | 16 | 21 | Jiangxi  | 124 | 16 | 20 |
| Chongqing | 62 | 16 | 18 | Jiangxi  | 125 | 18 | 21 |
| Yunnan    | 63 | 20 | 17 |          |     |    |    |

**Table S2.** Developmental parameters for fall armyworm [1]

|         | Constant<br>s   | Description                                                                                                 | Value                                                | Units       |
|---------|-----------------|-------------------------------------------------------------------------------------------------------------|------------------------------------------------------|-------------|
| Kinetic | $\varepsilon_c$ | Relative concentration of development factors (gene activators and/or biochemical catalysts and regulators) | mean = 1.0<br>and<br>standard<br>deviation<br>$\rho$ | -           |
|         | $R$             | The universal gas constant                                                                                  | 1.987                                                | cal/(K·mol) |

|                |              |                                                     |           |                    |
|----------------|--------------|-----------------------------------------------------|-----------|--------------------|
|                | $H_A^\#$     | Enthalpy of activation of the developmental process | 11,822.57 | cal/mole           |
|                | $\Delta S_L$ | Change in entropy of low temperature inactivation   | -19.59    | cal/mole - °K      |
|                | $\Delta H_L$ | Change in enthalpy of low temperature inactivation  | -6603.414 | cal/mole           |
|                | $\Delta S_H$ | Change in entropy of high temperature inactivation  | 295.08    | cal/mole - °K      |
|                | $\Delta H_H$ | Change in enthalpy of high temperature inactivation | 90,678.50 | cal/mole           |
| Life stage     |              |                                                     |           |                    |
| (egg-to-adult) | $\phi$       | The life stage constant                             | 12.254    | Time <sup>-1</sup> |
|                | $\rho$       | The standard deviation of $\varepsilon_c$           | 0.0507    | -                  |

**Table S3.** Probability density of FAW landing points by province for February-August 2020

| Province  | February | March  | April  | May    | June   | July   | August |
|-----------|----------|--------|--------|--------|--------|--------|--------|
| Guangxi   | 59.63%   | 38.34% | 30.90% | 30.34% | 5.03%  | 2.56%  | 0.96%  |
| Yunnan    | 19.72%   | 46.79% | 42.44% | 5.26%  | 0.98%  | 0.25%  | 0.48%  |
| Guangdong | 12.39%   | 8.92%  | 9.82%  | 18.42% | 3.26%  | 0.36%  | 0.12%  |
| Hainan    | 3.90%    | 4.30%  | 3.37%  | 1.36%  | 0.00%  | 0.00%  | 0.00%  |
| Fujian    | 2.29%    | 0.31%  | 0.43%  | 6.17%  | 4.91%  | 3.61%  | 0.91%  |
| Jiangxi   | 1.61%    | 0.63%  | 1.59%  | 11.97% | 21.87% | 6.24%  | 1.82%  |
| Hunan     | 0.23%    | 0.00%  | 5.05%  | 13.78% | 18.52% | 13.45% | 1.15%  |
| Zhejiang  | 0.23%    | 0.00%  | 0.00%  | 1.67%  | 18.43% | 21.22% | 6.02%  |
| Guizhou   | 0.00%    | 0.55%  | 6.16%  | 7.03%  | 5.39%  | 2.84%  | 0.90%  |
| Taiwan    | 0.00%    | 0.16%  | 0.05%  | 0.71%  | 0.00%  | 0.00%  | 0.00%  |
| Chongqing | 0.00%    | 0.00%  | 0.19%  | 0.92%  | 1.42%  | 5.33%  | 1.58%  |
| Hubei     | 0.00%    | 0.00%  | 0.00%  | 1.67%  | 13.46% | 10.64% | 3.41%  |
| Anhui     | 0.00%    | 0.00%  | 0.00%  | 0.59%  | 4.39%  | 14.72% | 29.77% |
| Sichuan   | 0.00%    | 0.00%  | 0.00%  | 0.07%  | 0.79%  | 5.71%  | 5.71%  |
| Henan     | 0.00%    | 0.00%  | 0.00%  | 0.04%  | 0.45%  | 1.98%  | 8.60%  |
| Jiangsu   | 0.00%    | 0.00%  | 0.00%  | 0.00%  | 0.67%  | 7.84%  | 26.56% |
| Shanghai  | 0.00%    | 0.00%  | 0.00%  | 0.00%  | 0.26%  | 1.65%  | 1.25%  |
| Shaanxi   | 0.00%    | 0.00%  | 0.00%  | 0.00%  | 0.15%  | 1.14%  | 1.66%  |
| Shandong  | 0.00%    | 0.00%  | 0.00%  | 0.00%  | 0.01%  | 0.18%  | 7.69%  |
| Gansu     | 0.00%    | 0.00%  | 0.00%  | 0.00%  | 0.01%  | 0.00%  | 0.00%  |
| Shanxi    | 0.00%    | 0.00%  | 0.00%  | 0.00%  | 0.00%  | 0.25%  | 0.21%  |
| Hebei     | 0.00%    | 0.00%  | 0.00%  | 0.00%  | 0.00%  | 0.03%  | 0.54%  |
| Liaoning  | 0.00%    | 0.00%  | 0.00%  | 0.00%  | 0.00%  | 0.00%  | 0.60%  |
| Tianjin   | 0.00%    | 0.00%  | 0.00%  | 0.00%  | 0.00%  | 0.00%  | 0.04%  |

|         |       |       |       |       |       |       |       |
|---------|-------|-------|-------|-------|-------|-------|-------|
| Beijing | 0.00% | 0.00% | 0.00% | 0.00% | 0.00% | 0.00% | 0.02% |
|---------|-------|-------|-------|-------|-------|-------|-------|

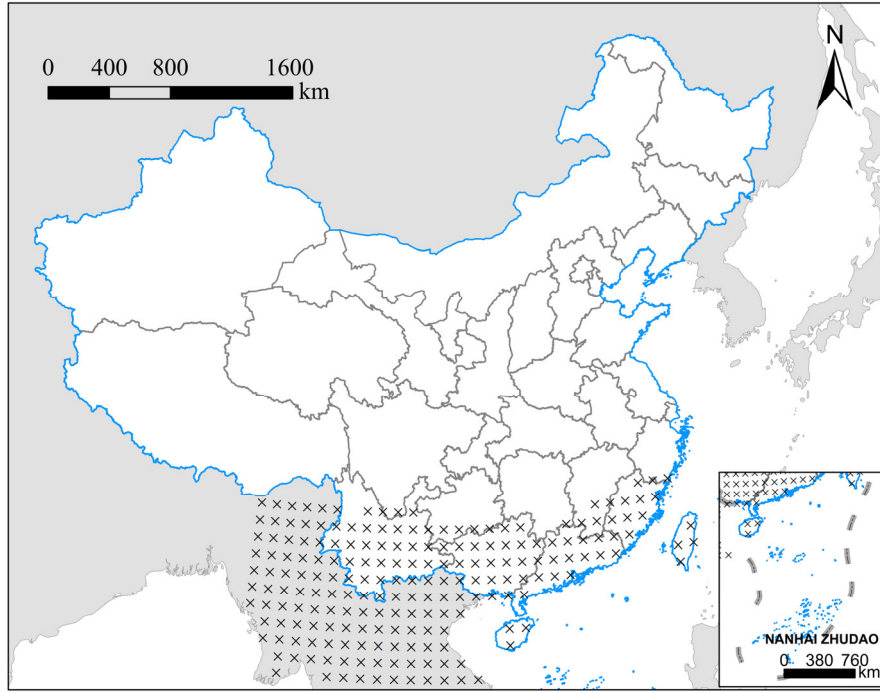

**Figure S1.** The starting points of the fall armyworm's migration every night in February 2020. The points are evenly distributed in the annual breeding area in a  $1^{\circ} \times 1^{\circ}$  grid.

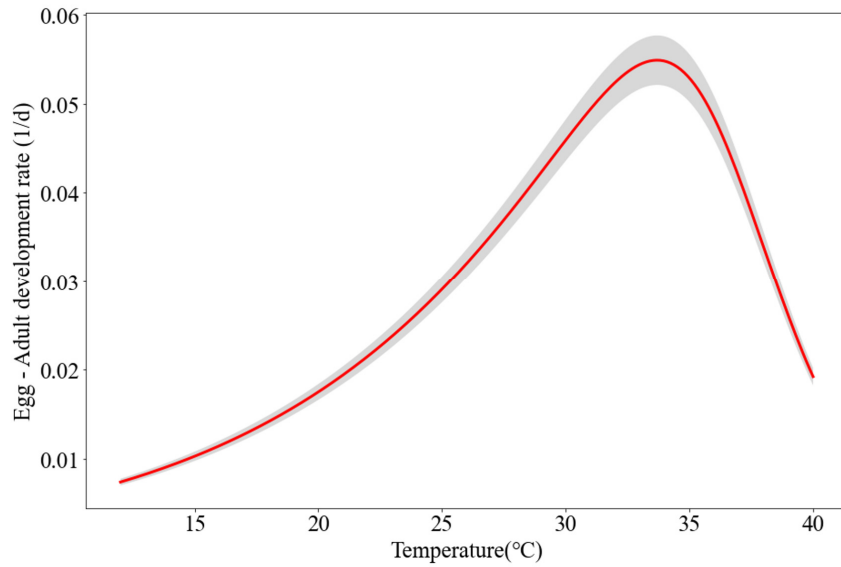

**Figure S2.** Simulation results of the temperature-dependent model of fall armyworm [1,2]. The growth rate of fall armyworm changes with temperature. The shaded area is given as the mean value  $\pm 1$  std.

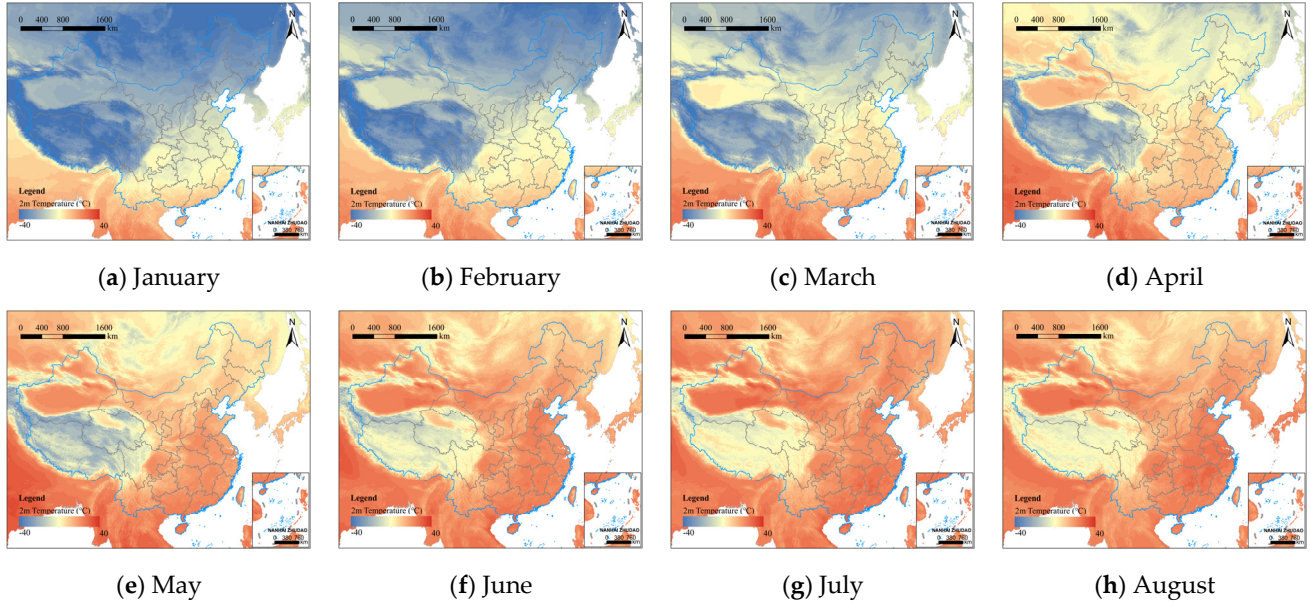

**Figure S3.** Monthly average 2m temperature from January to August 2020; (a)–(h) represent different months.

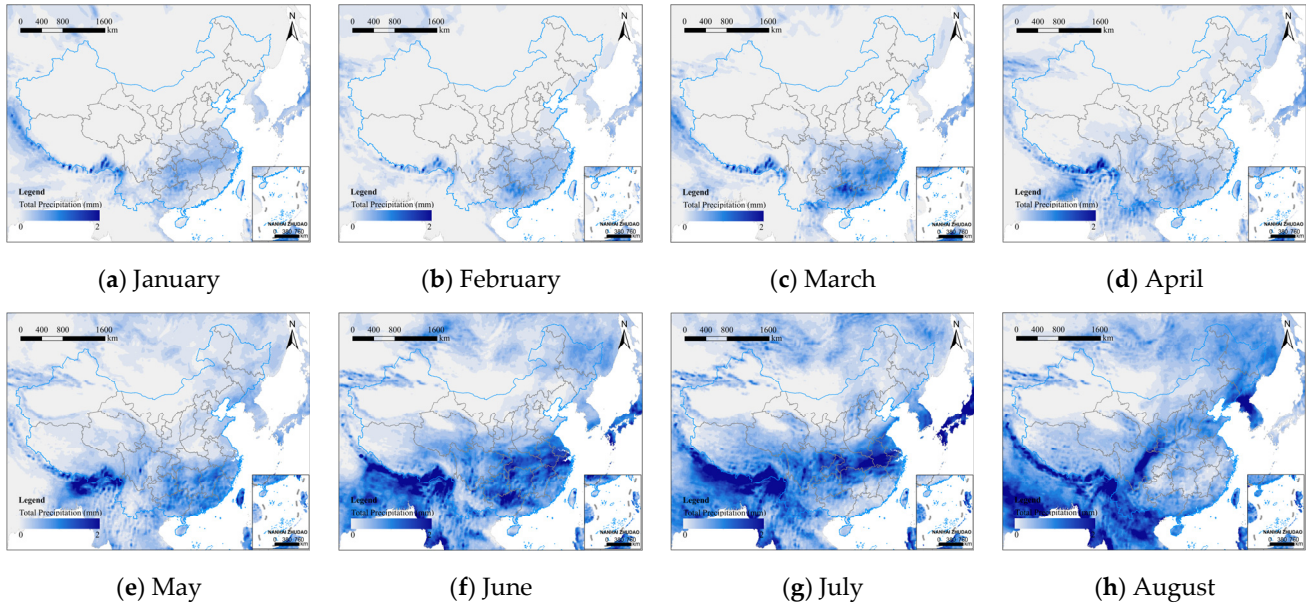

**Figure S4.** Monthly total precipitation from January to August 2020; (a)–(h) represent different months.

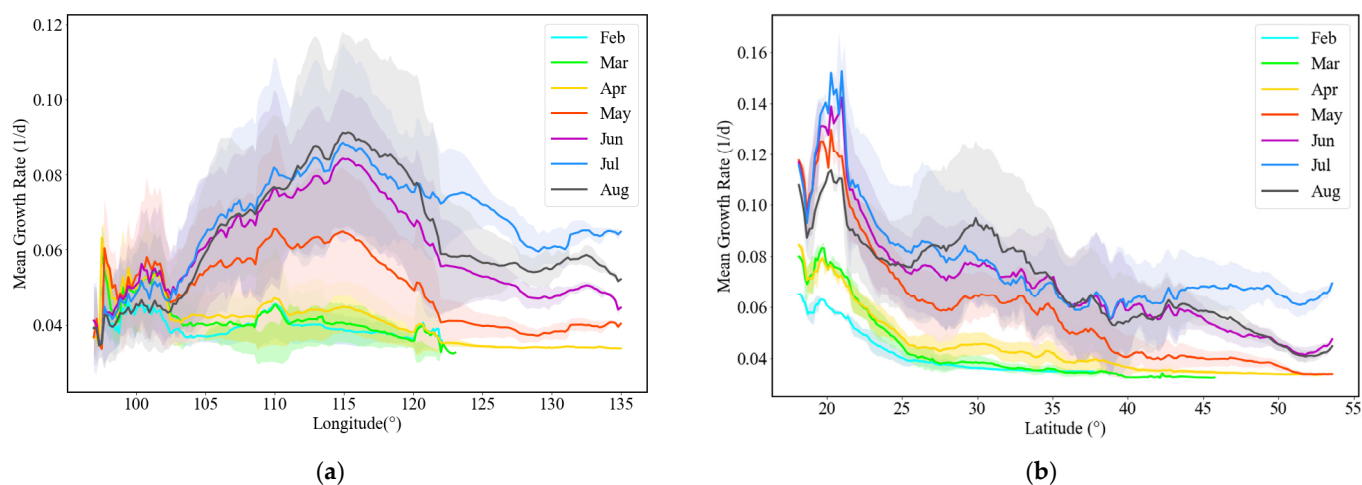

**Figure S5.** The monthly mean daily growth rate (environmental suitability) of FAW by (a) longitude, (b) latitude from January to August 2020; The shaded area is given as the mean value  $\pm 1$  std.

### References

1. Barfield, C.S.; Mitchell, E.R.; Poeb, S.L.; A Temperature-Dependent Model for Fall Armyworm Development. *Ann. Entomol. Soc. Am.* **1978**, *71*, 70–74. <https://doi.org/10.1093/aesa/71.1.70>.
2. Maino, J.L.; Schouten, R.; Overton, K.; Day, R.; Ekesi, S.; Bett, B.; Barton, M.; Gregg, P.C.; Umina, P.A.; Reynolds, O.L. Regional and Seasonal Activity Predictions for Fall Armyworm in Australia. *Curr. Res. Insect Sci.* **2021**, *1*, 100010. <https://doi.org/10.1016/j.cris.2021.100010>.
